# Supplementary material for: Mechanical properties of amorphous CO2 hydrates: insights from molecular simulations
Source: Royal Society of Chemistry journal article supplement (doi:10.1039/d4cp00203b), 2024-01-01
Supplement: d4cp00203b9.pdf [file d4cp00203b9.pdf]

## SUPPORTING INFORMATION FOR

### Mechanical Properties of Amorphous CO<sub>2</sub> Hydrates: Insights from Molecular Simulations

Pinqiang Cao <sup>1,\*</sup>, Jianyang Wu <sup>2</sup>, Fulong Ning <sup>3</sup>

<sup>1</sup> School of Resource and Environmental Engineering, Wuhan University of Science and Technology,  
Wuhan, Hubei 430081, China

<sup>2</sup> Department of Physics, Research Institute for Biomimetics and Soft Matter, Fujian Provincial Key  
Laboratory for Soft Functional Materials Research, Xiamen University, Xiamen 361005, China

<sup>3</sup> Faculty of Engineering, China University of Geosciences, Wuhan, Hubei 430074, China.

Email address:

Pinqiang Cao: [pinqiang@wust.edu.cn](mailto:pinqiang@wust.edu.cn); [pinqiang2022@163.com](mailto:pinqiang2022@163.com);

Jianyang Wu: [jianyang@xmu.edu.cn](mailto:jianyang@xmu.edu.cn);

Fulong Ning: [nflzx@cug.edu.edu](mailto:nflzx@cug.edu.edu);

\*To whom correspondence should be addressed: [pinqiang@wust.edu.cn](mailto:pinqiang@wust.edu.cn); [pinqiang2022@163.com](mailto:pinqiang2022@163.com);

**This PDF File Includes:**

Figure S1. Potential energy of amorphous CO<sub>2</sub> hydrates.

Figure S2. Radial distribution function (RDF) of amorphous CO<sub>2</sub> hydrates with a water/CO<sub>2</sub> ratio of about 5.98 at 263.15 K and 100 atm.

Figure S3. N-Hbond-DOP order parameter of amorphous CO<sub>2</sub> hydrates.

Figure S4. N-CO<sub>2</sub>-DOP order parameter of amorphous CO<sub>2</sub> hydrates.

Figure S5. Mechanical properties of six different amorphous CO<sub>2</sub> hydrate samples with a water/CO<sub>2</sub> ratio of 5.98 at 263.15 K and 100 atm.

Figure S6. DOP order parameter of amorphous CO<sub>2</sub> hydrates with a water/CO<sub>2</sub> ratio of 5.98 at 263.15 K and 100 atm.

Figure S7. Molecular structures of CO<sub>2</sub> molecules in amorphous CO<sub>2</sub> hydrates with a water/CO<sub>2</sub> ratio of 5.98 at 283.15 K and 100 atm.

**Other Supporting Online Material for This Manuscript Includes the Following:**

Movies S1-S6. Visualization of amorphous CO<sub>2</sub> hydrates under mechanical loads.

Movies S7-S8. Visualization of CO<sub>2</sub> molecules in amorphous CO<sub>2</sub> hydrates with a water/CO<sub>2</sub> ratio of about 5.98 at 283.15 K and 100 atm.

## Supporting Supplementary Materials

Figure S1

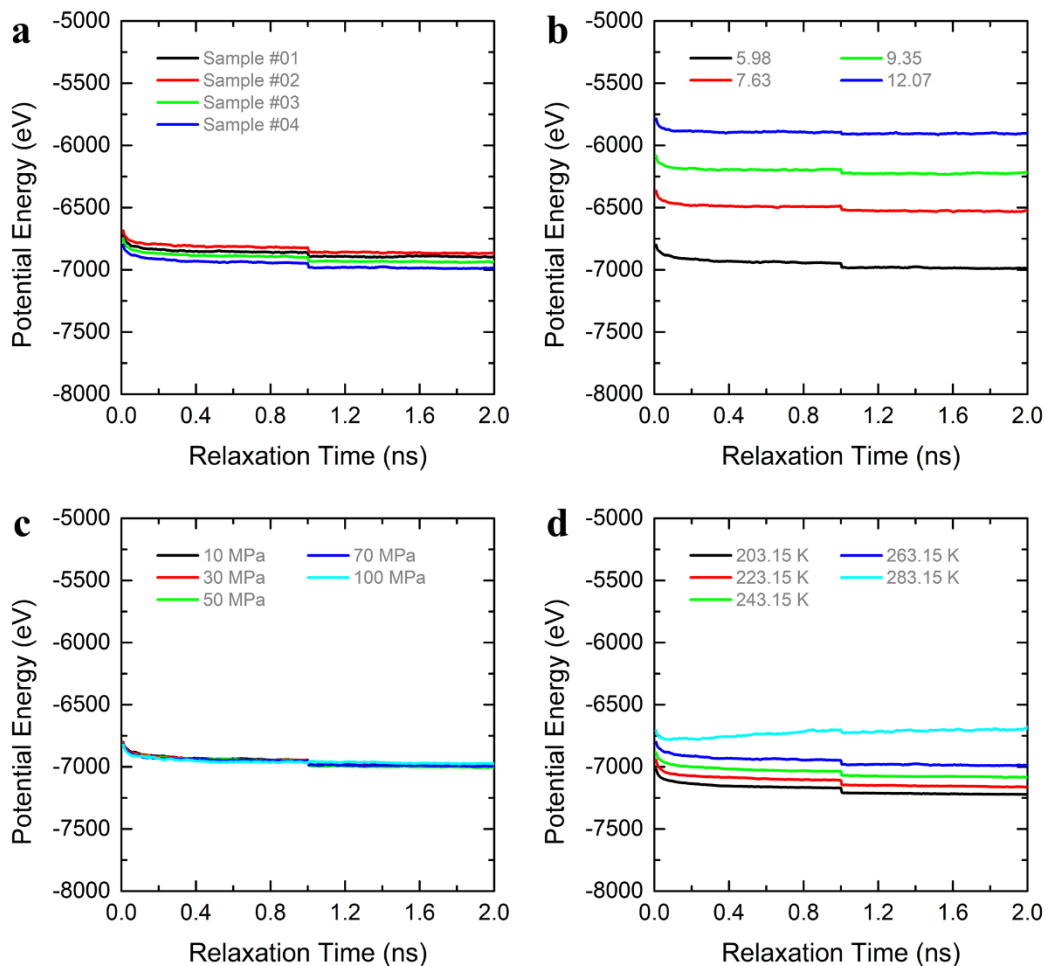

**Figure S1. Potential energy of amorphous CO<sub>2</sub> hydrates.** (a) Four amorphous CO<sub>2</sub> hydrate systems with a water/CO<sub>2</sub> ratio of about 5.98 at 263.15 K and 100 atm. (b) Different water/CO<sub>2</sub> ratios at 263.15 K and 100 atm. (c) Different confining pressures with a water/CO<sub>2</sub> ratio of about 5.98 at 263.15 K. (d) Different temperatures with a water/CO<sub>2</sub> ratio of about 5.98 at 100 atm.

**Figure S2**

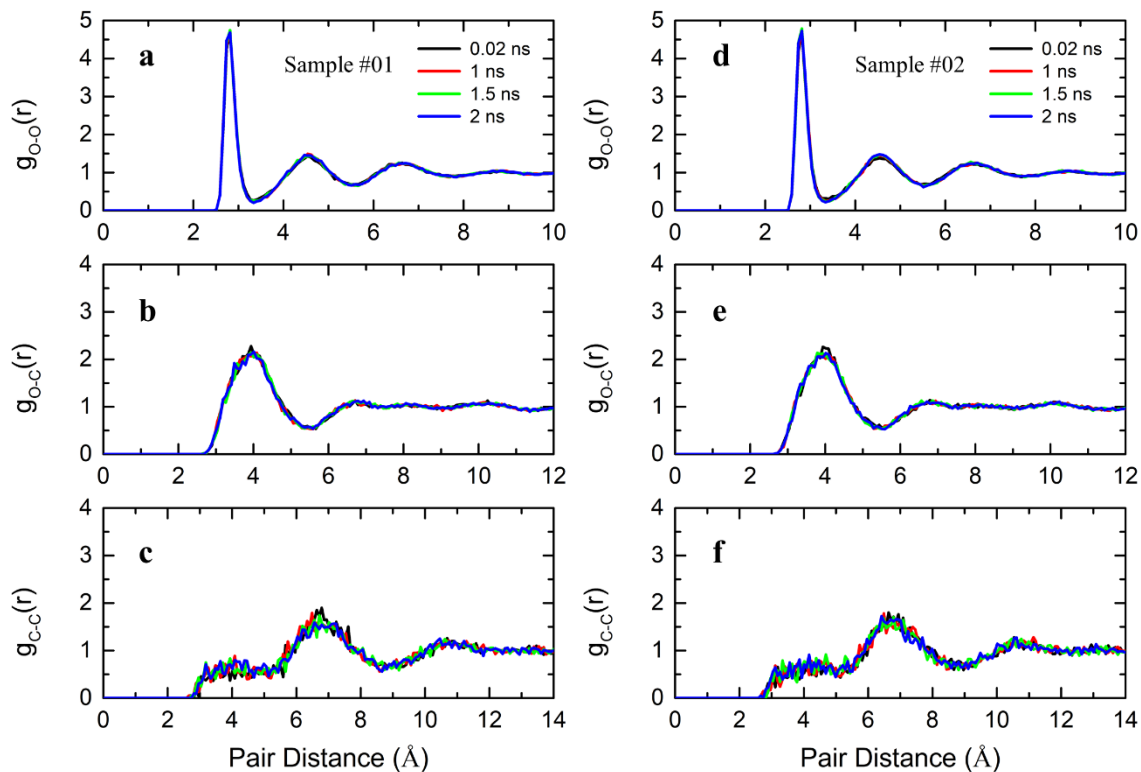

**Figure S2. Radial distribution function (RDF) of amorphous CO<sub>2</sub> hydrates with a water/CO<sub>2</sub> ratio of about 5.98 at 263.15 K and 100 atm. (a)-(c) Sample #01 of the six prepared samples at different relaxation states. (d)-(f) Sample #02 of the six prepared samples at different relaxation states.**

**Figure S3**

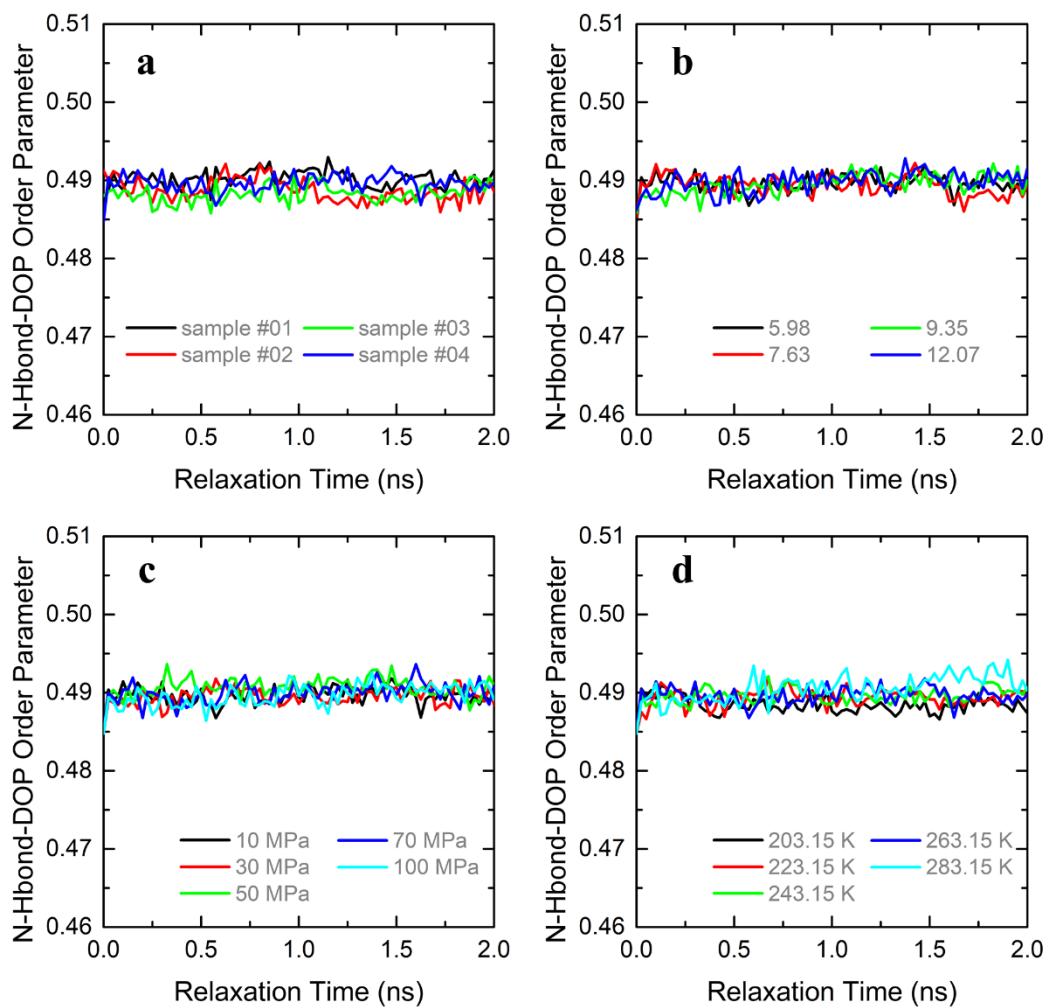

**Figure S3. N-Hbond-DOP order parameter of amorphous CO<sub>2</sub> hydrates.** (a) Different samples with a water/CO<sub>2</sub> ratio of about 5.98 at 263.15 K and 100 atm. (b) Different water/CO<sub>2</sub> ratios at 263.15 K and 100 atm. (c) Different confining pressures with a water/CO<sub>2</sub> ratio of about 5.98 at 263.15 K. (d) Different temperatures with a water/CO<sub>2</sub> ratio of about 5.98 at 100 atm.

**Figure S4**

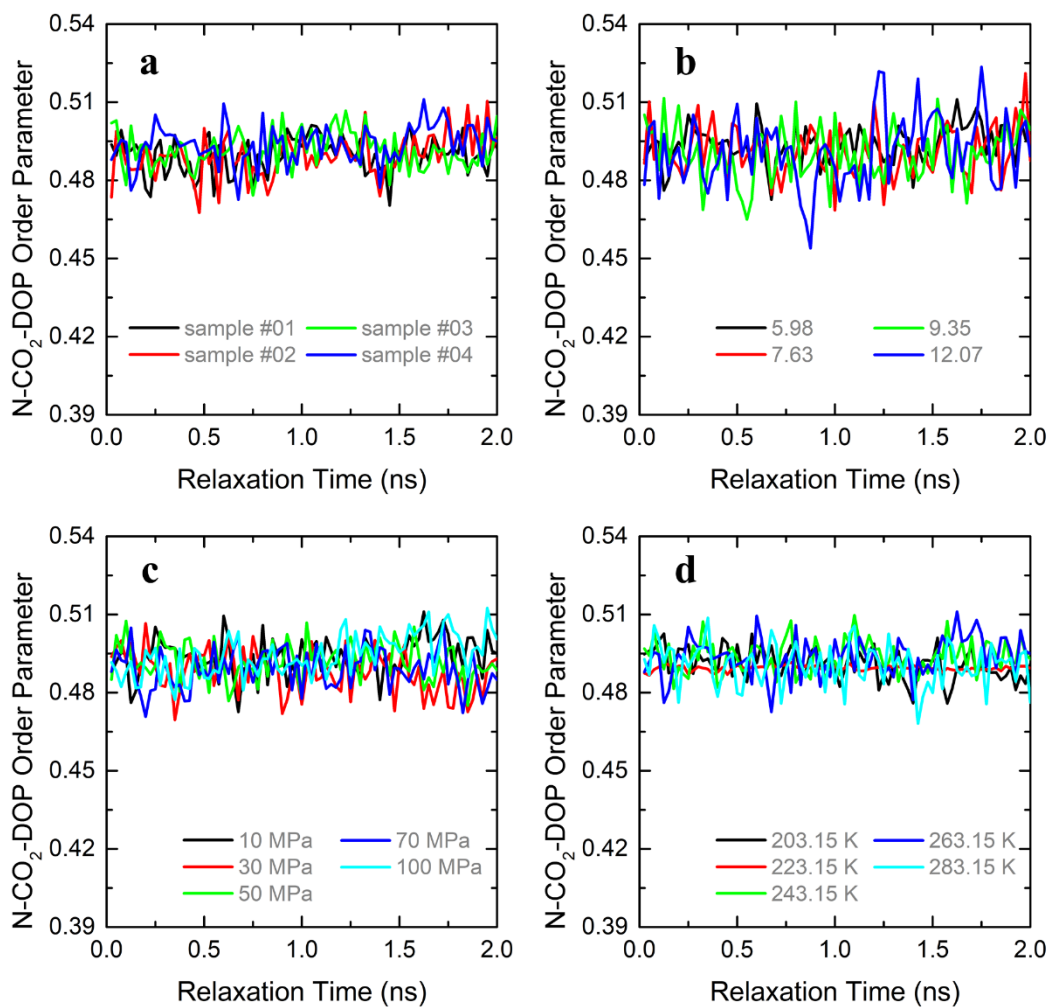

**Figure S4. N-CO<sub>2</sub>-DOP order parameter of amorphous CO<sub>2</sub> hydrates.** (a) Different samples with a water/CO<sub>2</sub> ratio of about 5.98 at 263.15 K and 100 atm. (b) Different water/CO<sub>2</sub> ratios at 263.15 K and 100 atm. (c) Different confining pressures with a water/CO<sub>2</sub> ratio of about 5.98 at 263.15 K. (d) Different temperatures with a water/CO<sub>2</sub> ratio of about 5.98 at 100 atm.

**Figure S5**

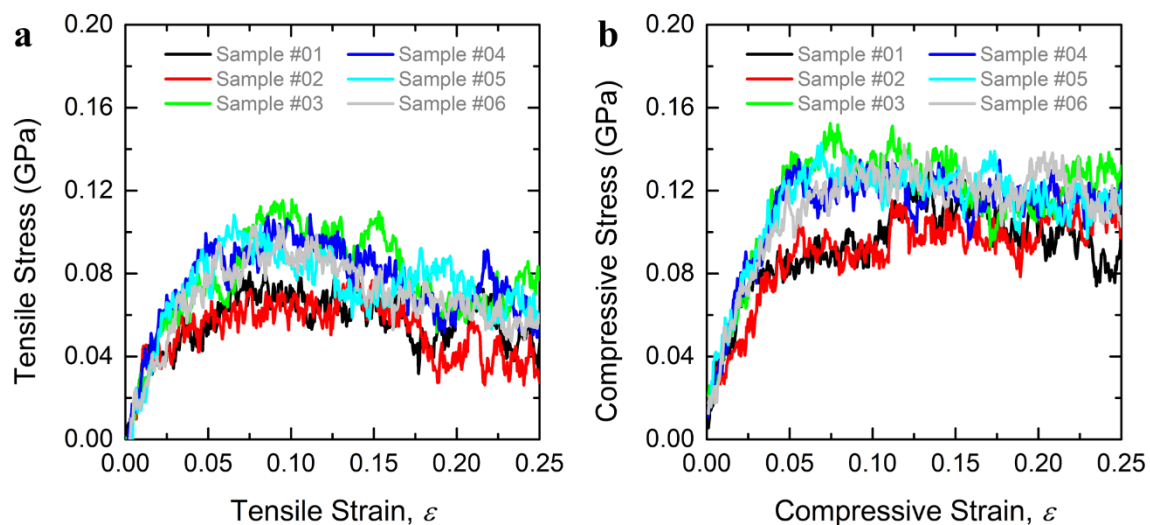

**Figure S5. Mechanical properties of six different amorphous CO<sub>2</sub> hydrate samples with a water/CO<sub>2</sub> ratio of about 5.98 at 263.15 K and 100 atm. (a) Tension loads. (b) Compression loads.**

Figure S6

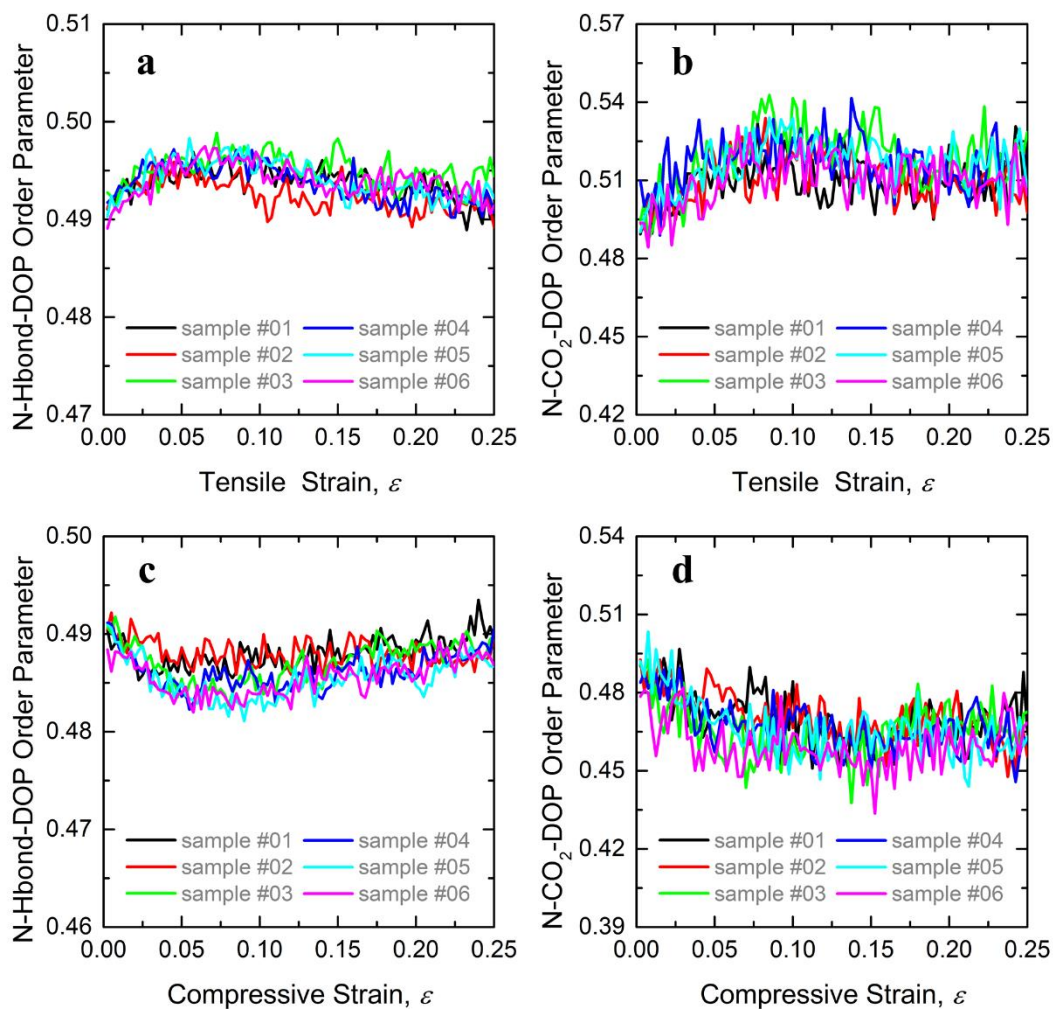

**Figure S6. DOP order parameter of amorphous CO<sub>2</sub> hydrates with a water/CO<sub>2</sub> ratio of about 5.98 at 263.15 K and 100 atm.** (a) N-Hbond-DOP order parameter under tension. (b) N-CO<sub>2</sub>-DOP order parameter under tension. (c) N-Hbond-DOP order parameter under compression. (d) N-CO<sub>2</sub>-DOP order parameter under compression.



**Figure S7**

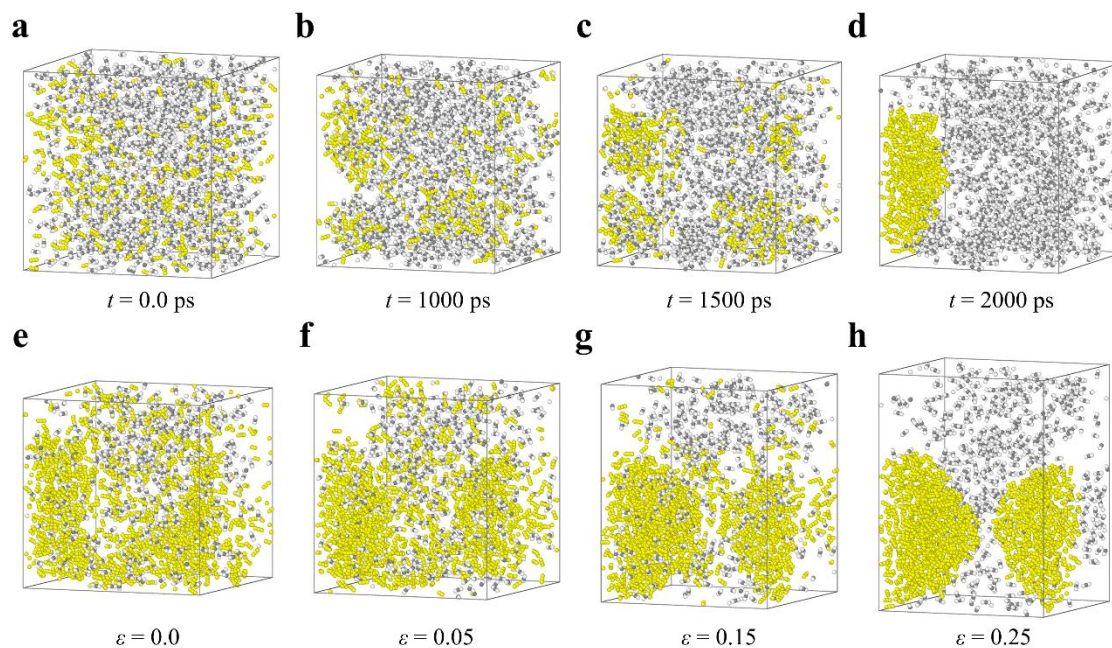

**Figure S7. Molecular structures of CO<sub>2</sub> molecules in amorphous CO<sub>2</sub> hydrates with a water/CO<sub>2</sub> ratio of about 5.98 at 283.15 K and 100 atm. (a)-(d) Perspective views of CO<sub>2</sub> molecules in amorphous CO<sub>2</sub> hydrates at different relaxation times. (e)-(h) Perspective views of CO<sub>2</sub> molecules in amorphous CO<sub>2</sub> hydrates at different tensile strains. In Figure S7, some CO<sub>2</sub> molecules are rendered by yellow to monitor the formation of CO<sub>2</sub> nanobubble.**

### **Movies S1-S3**

Movies S1-S3. Visualization of amorphous CO<sub>2</sub> hydrates under tension. S1: A sample with a water/CO<sub>2</sub> ratio of 12.07 at 263.15 K and 100 atm. S2: A sample with a water/CO<sub>2</sub> ratio of 5.98 at 263.15 K and 700 atm. S3: A sample with a water/CO<sub>2</sub> ratio of 5.98 at 203.15 K and 100 atm. All water structures are colored by the potential energy. Carbon and Oxygen atoms in CO<sub>2</sub> molecules are colored with grey and white, respectively. Hydrogen atoms in water molecules are not shown for clarity.

### **Movies S4-S6**

Movies S4-S6. Visualization of amorphous CO<sub>2</sub> hydrates under compression. S1: A sample with a water/CO<sub>2</sub> ratio of 12.07 at 263.15 K and 100 atm. S2: A sample with a water/CO<sub>2</sub> ratio of 5.98 at 263.15 K and 700 atm. S3: A sample with a water/CO<sub>2</sub> ratio of 5.98 at 203.15 K and 100 atm. All water structures are colored by the potential energy. Carbon and Oxygen atoms in CO<sub>2</sub> molecules are colored with grey and white, respectively. Hydrogen atoms in water molecules are not shown for clarity.

### **Movies S7-S8**

Movies S7-S8. Visualization of CO<sub>2</sub> molecules in amorphous CO<sub>2</sub> hydrates with a water/CO<sub>2</sub> ratio of 5.98 at 283.15 K and 100 atm. S7: A sample at relaxation process. S8: A sample under tension loads. Carbon and Oxygen atoms in CO<sub>2</sub> molecules are colored with grey and white, respectively. Water molecules are not shown for clarity. In Movies S7-S8, some CO<sub>2</sub> molecules are rendered by yellow to monitor the formation of CO<sub>2</sub> nanobubble.
